# Supplementary material
Source: PubMed Central journal article supplement (PMC4507337)
Supplement: JB.00304-15_zjb999093705so1.pdf [file JB.00304-15_zjb999093705so1.pdf]

**An ABC transporter required for intercellular transfer of developmental signals in a heterocystous cyanobacterium**

**Patrick Videau<sup>a,1</sup>, Orion S. Rivers<sup>a</sup>, Kelly C. Higa<sup>a,2</sup> and Sean M. Callahan<sup>a\*</sup>**

<sup>a</sup>Department of Microbiology, University of Hawai'i at Mānoa, USA

**Present address:** <sup>1</sup>Oregon State University, College of Pharmacy, 103 Memorial Place, 418 Weniger Hall, Corvallis, OR 97331; <sup>2</sup>University of Colorado Anschutz Medical Campus, Department of Immunology & Microbiology, 12800 E. 19th Ave., RC1-North Tower, Aurora, CO 80045

**#For correspondence:** E-mail scallaha@hawaii.edu; Tel. (+1) 808 956 8015; Fax (+1) 808 956 5339

**Supporting Information**

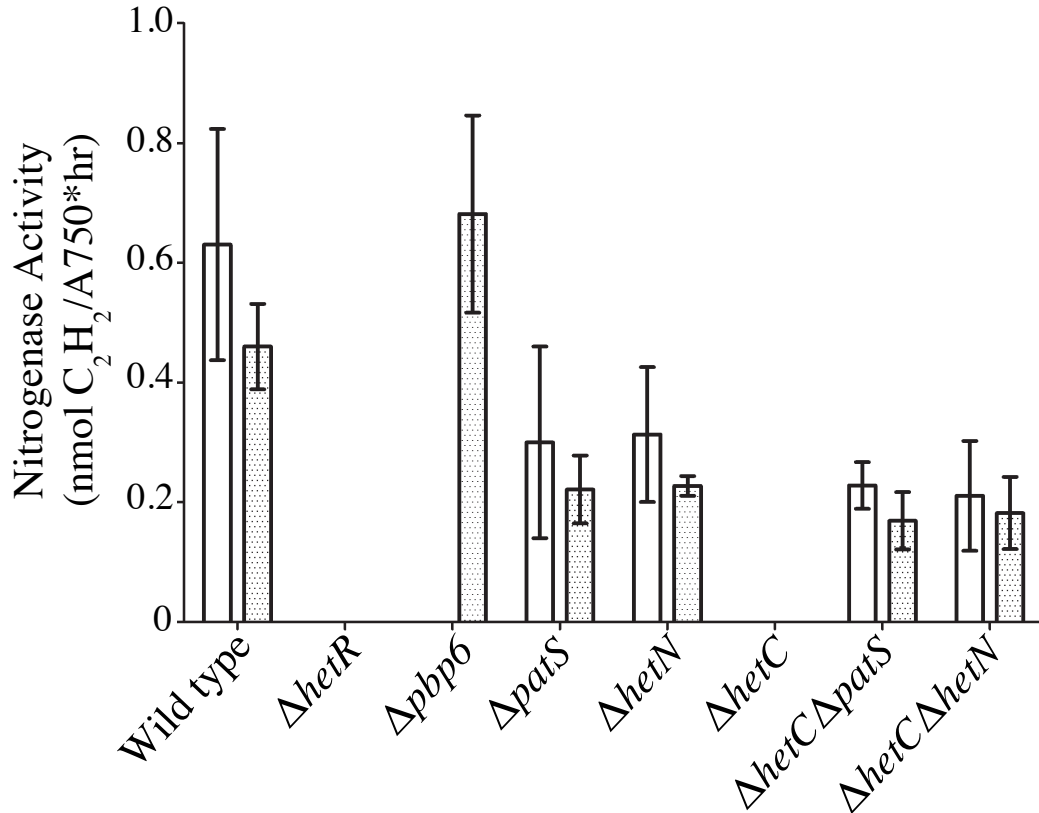

**Figure S1.** Acetylene reduction assay with *hetC*-mutant strains conducted in aerobic (clear bars) or anaerobic (dotted bars) conditions either 24 h (wild type,  $\Delta hetR$ ,  $\Delta patS$ , and  $\Delta hetC \Delta patS$  strains) or 48 h ( $\Delta hetC$ ,  $\Delta hetN$ , and  $\Delta hetC \Delta hetN$  strains) after the removal of combined nitrogen. Error bars represent one standard deviation.

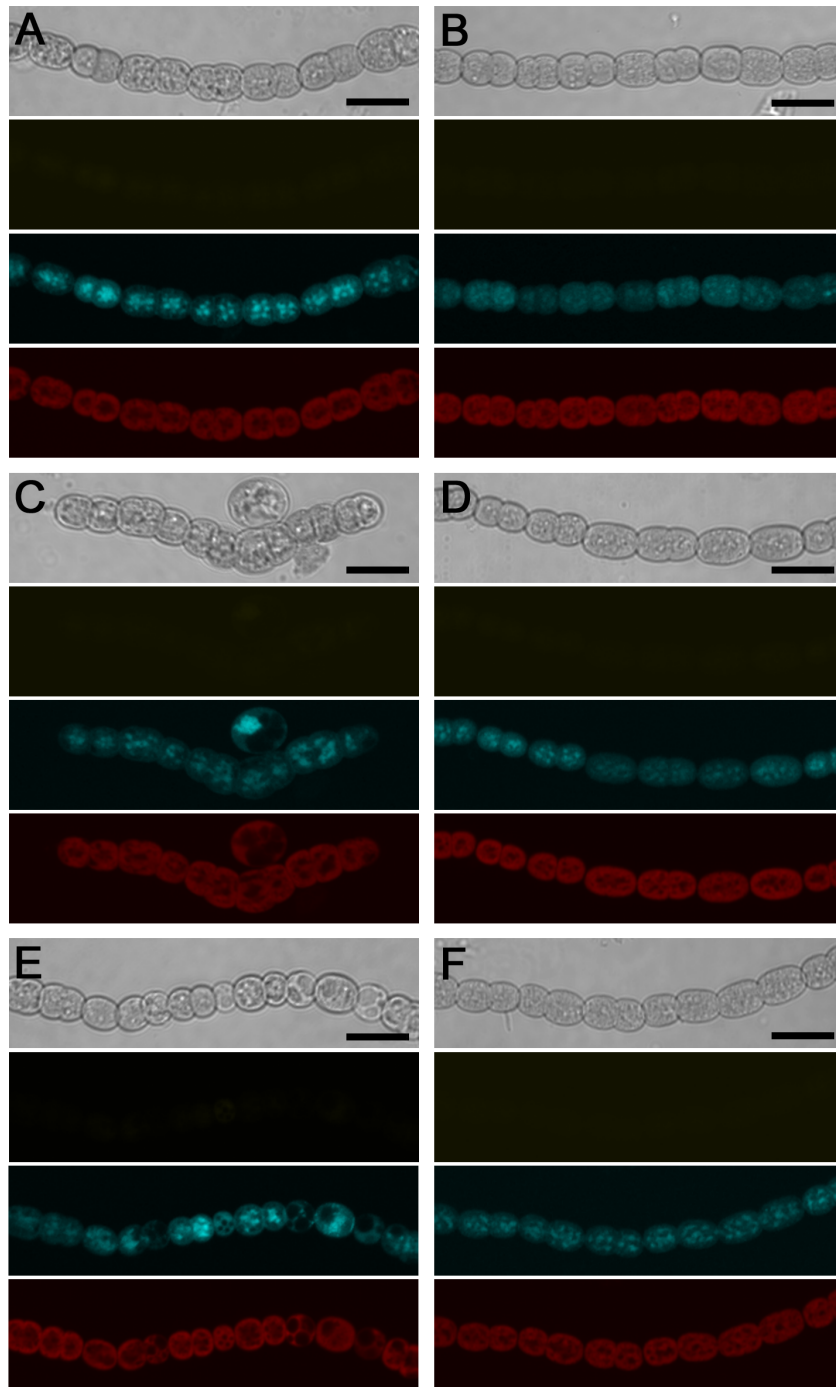

**Figure S2.** Source cells are not present at 0 h after the induction of differentiation. Plasmid pPJAV247 contains a  $P_{patS}$ -YFP transcriptional fusion divergently transcribed from  $P_{petE}$ -*hetR*(H69Y)-CFP and was introduced into the wild type (A),  $\Delta$ *hetC* (B),  $\Delta$ *patS* (C),  $\Delta$ *hetC*  $\Delta$ *patS* (D),  $\Delta$ *hetN* (E), and  $\Delta$ *hetC*  $\Delta$ *hetN* (F) strains. Cultures were maintained in the presence of ammonia and were imaged 0 h after its removal. From top to bottom: bright field, yellow fluorescence from  $P_{patS}$ -YFP, blue fluorescence from  $P_{petE}$ -*hetR*(H69Y)-CFP, and red autofluorescence. Bar, 10  $\mu$ m.

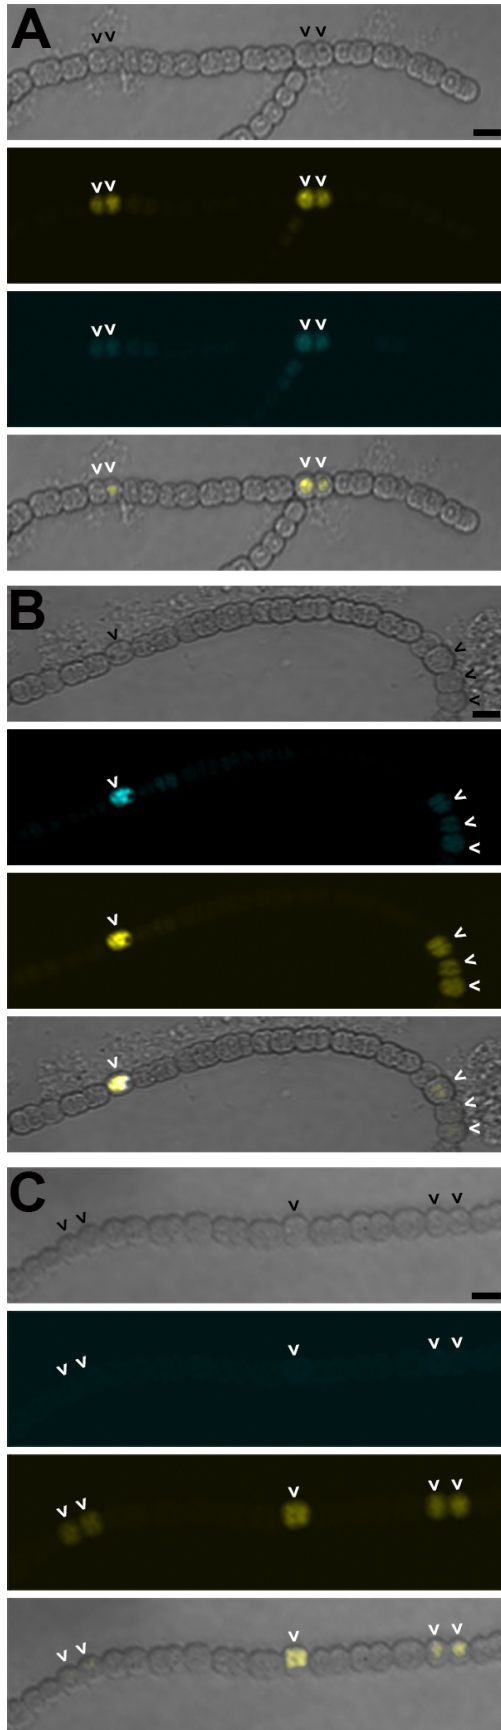

**Figure S3.** Short cell intervals between heterocysts do not display measureable signal ranges. The wild type (A),  $\Delta hetN$  (B),  $\Delta hetN\Delta hetC$  (C) strains harboring pPJAV247, which encodes YFP expressed from the *patS* promoter to mark proheterocysts and HetR(H69Y)-CFP expressed from the copper-inducible *petE* promoter, were imaged 9 h after the removal of combined nitrogen. From top to bottom: bright field, yellow fluorescence from  $P_{patS}$ -YFP, blue fluorescence from HetR(H69Y)-CFP, and the composite image. Carets indicate proheterocysts. Bar, 10  $\mu$ m.

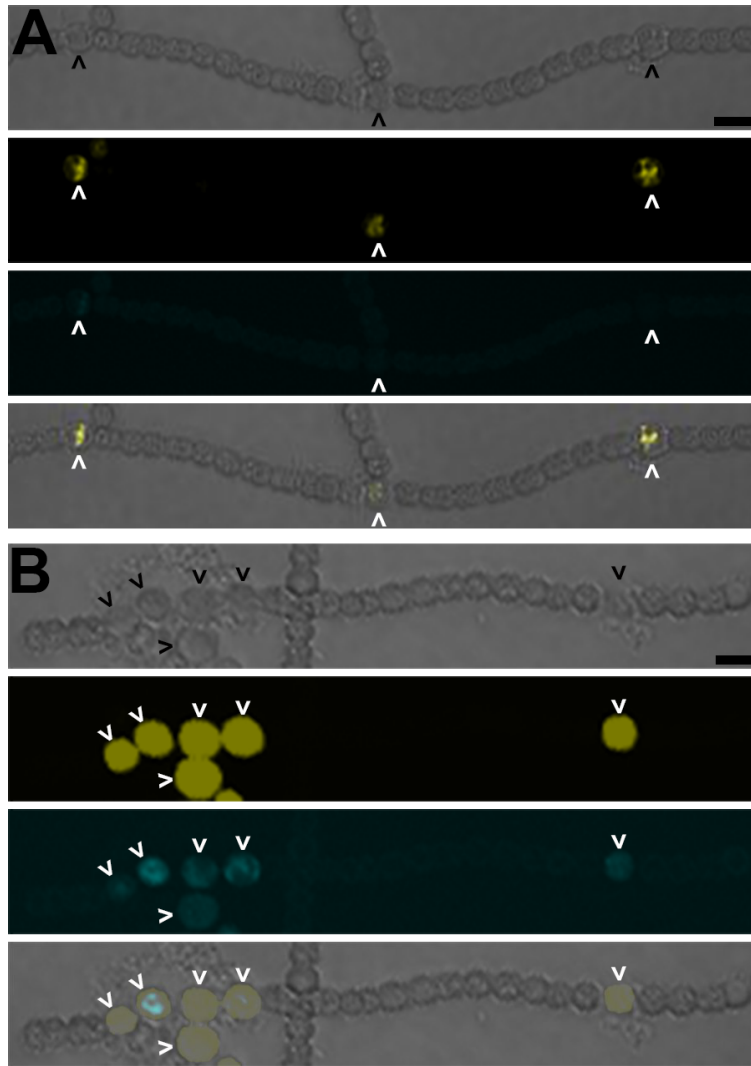

**Figure S4.** Short cell intervals between heterocysts do not display measurable signal ranges. The wild type (A) and  $\Delta hetN$  (B) strains harboring pJAV247, which encodes YFP expressed from the *patS* promoter to mark proheterocysts and HetR(H69Y)-CFP expressed from the copper-inducible *petE* promoter, were imaged 24 (A) or 48 h (B) after the removal of combined nitrogen. From top to bottom: bright field, yellow fluorescence from  $P_{patS}$ -YFP, blue fluorescence from HetR(H69Y)-CFP, and the composite image. Carets indicate heterocysts. Bar, 10  $\mu$ m.

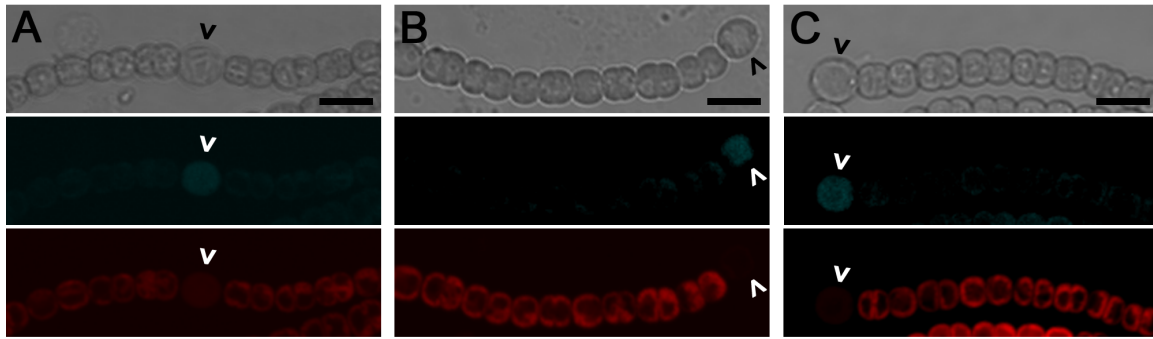

**Figure S5.** Transcription of *hetN* is unaltered in heterocysts produced by strains containing a *hetC* mutation. The plasmid pPJAV341, which contains a transcriptional fusion of the *hetN* promoter to the FMN-dependent fluorophore EcFbFP, was introduced into the wild type (A),  $\Delta$ *hetC* (B), and  $\Delta$ *patS*  $\Delta$ *hetC* (C) strains. Cultures were imaged 48 h after the removal of combined nitrogen. From top to bottom: bright field, blue fluorescence from  $P_{hetN}$ -EcFbFP, and red autofluorescence. Carets indicate heterocysts. Bar, 10  $\mu$ m.

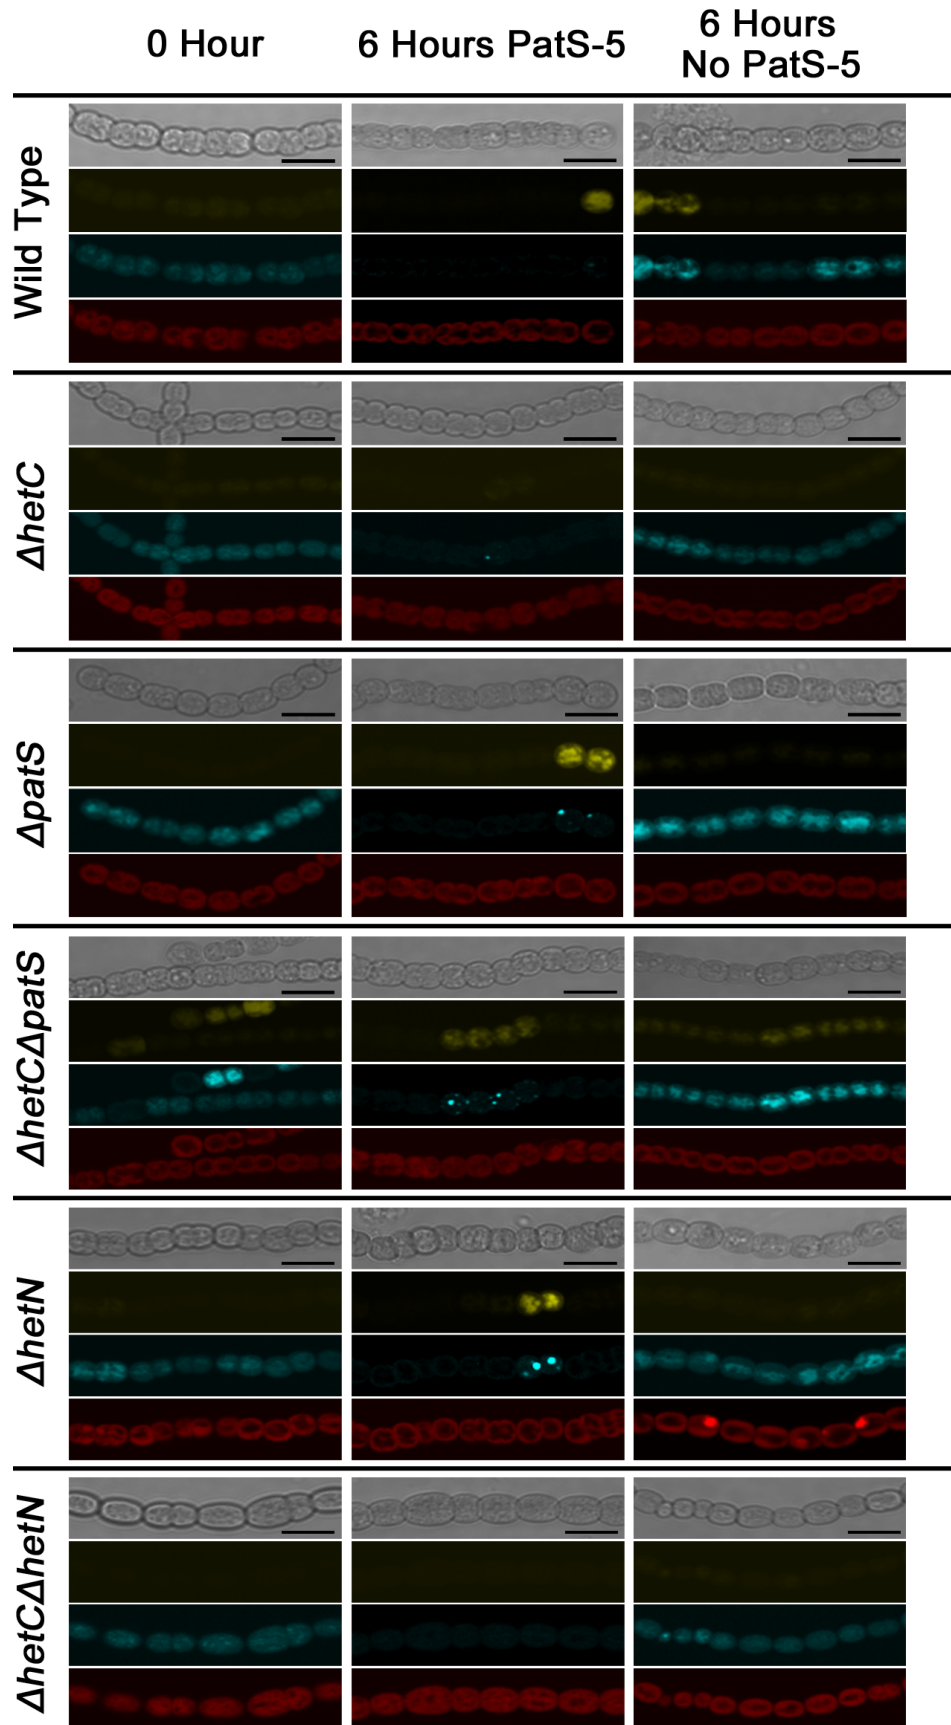

**Figure S6.** Degradation of HetR-CFP in response to RGSGR peptide. Plasmid pPJAV247 contains a PpatS-YFP transcriptional fusion divergently transcribed from  $P_{petE}$ -*hetR(H69Y)*-CFP and was introduced into the indicated strains. Cultures were maintained in the presence of nitrate and imaged before and 6 hours after the addition of 10  $\mu$ M PatS-5 pentapeptide (RGSGR) or a control to which nothing was added. From top to bottom: bright field, yellow fluorescence from  $P_{patS}$ -YFP, blue fluorescence from  $P_{petE}$ -*hetR(H69Y)*-CFP, and red autofluorescence. Bar, 10  $\mu$ m.



**Table S1.** Patterns of heterocysts produced by strains of *Anabaena*.

| Strain (Genotype)                                                 | Hours N- | Heterocyst Percentage | Mean Vegetative Cell Interval | Heterocyst Occurrence                           | Diazotrophic Growth |
|-------------------------------------------------------------------|----------|-----------------------|-------------------------------|-------------------------------------------------|---------------------|
| Wild type                                                         | 24       | 9.13 ± 0.64           | 10.9 ± 0.26                   | 95 ± 1.53;<br>5 ± 1.53                          | YES                 |
|                                                                   | 48       | 7.31 ± 0.61           | 13 ± 0.3                      | 94.11 ± 0.96;<br>5.44 ± 1.17<br>0.44 ± 0.51     |                     |
|                                                                   | 72       | 9.06 ± 0.42           | 13.2 ± 0.34                   | 94.11 ± 1.35;<br>5.89 ± 1.35                    |                     |
|                                                                   | 96       | 8.73 ± 1.01           | 14.3 ± 0.37                   | 93.22 ± 1.02;<br>6 ± 0.88;<br>0.78 ± 0.19       |                     |
|                                                                   | 120      | 8.93 ± 0.31           | 14.2 ± 0.36                   | 92.78 ± 1.07;<br>5.67 ± 1.2;<br>1.56 ± 0.51     |                     |
| UHM115 ( $\Delta hetN::\Omega$ Sp <sup>f</sup> /Sm <sup>f</sup> ) | 24       | 8.8 ± 0.53            | 11 ± 0.35                     | 86.78 ± 1.64;<br>12.89 ± 1.64;<br>0.33 ± 0.33   | YES                 |
|                                                                   | 48       | 13.5 ± 1.29           | 6.2 ± 0.38                    | 44.67 ± 1.2;<br>29.78 ± 0.77;<br>25.67 ± 0.58   |                     |
|                                                                   | 72       | 17.13 ± 1.47          | 5.7 ± 0.39                    | 34.89 ± 1.17;<br>28.11 ± 1.58;<br>37 ± 1.67     |                     |
|                                                                   | 96       | 17.7 ± 0.7            | 6.1 ± 0.44                    | 39.33 ± 0.88;<br>26.22 ± 0.84;<br>34.67 ± 01.15 |                     |
|                                                                   | 120      | 17.8 ± 1.4            | 6.7 ± 0.48                    | 40 ± 2.73;<br>20.11 ± 0.84;<br>39.89 ± 2.5      |                     |
| UHM334 ( $\Delta patS::\Omega$ Sp <sup>f</sup> /Sm <sup>f</sup> ) | 24       | 24.9 ± 2.7            | 3 ± 0.2                       | 58.22 ± 0.84;<br>40.78 ± 0.77;<br>1 ± 1.2       | YES                 |
|                                                                   | 48       | 20.13 ± 1.14          | 3.5 ± 0.21                    | 61.78 ± 2.52;<br>35.33 ± 2.73;<br>2.67 ± 1.2    |                     |
|                                                                   | 72       | 17.47 ± 1.94          | 4.3 ± 0.25                    | 63.33 ± 0.67;<br>29.44 ± 1.84;<br>7.33 ± 2.08   |                     |
|                                                                   | 96       | 15.7 ± 2.1            | 6.3 ± 0.34                    | 67.44 ± 2.67;<br>25 ± 0.88;<br>7.56 ± 1.9       |                     |
|                                                                   | 120      | 16.6 ± 1.31           | 6.3 ± 0.32                    | 69.78 ± 0.96;<br>24.56 ± 0.84;<br>5.67 ± 1.2    |                     |
| UHM232 ( $\Delta hetC$ )                                          | 24       | 0                     | -                             | -                                               | NO                  |
|                                                                   | 48       | 2.67 ± 1.2            | -                             | 98.78 ± 0.69;<br>1.22 ± 0.69                    |                     |
|                                                                   | 72       | 3.78 ± 1.49           | 21 ± 0.4                      | 94.78 ± 1.5;<br>5.11 ± 1.39                     |                     |
|                                                                   | 96       | 4.7 ± 1.25            | 19.7 ± 0.42                   | 93.44 ± 1.17;                                   |                     |

|                                                                                   |     |              |             |                                               |     |
|-----------------------------------------------------------------------------------|-----|--------------|-------------|-----------------------------------------------|-----|
|                                                                                   |     |              |             | 6.56 ± 1.17                                   |     |
|                                                                                   | 120 | 4.4 ± 1.67   | 18.5 ± 0.45 | 91.44 ± 1.68;<br>8.56 ± 1.68                  |     |
| UHM224<br>( <i>ΔhetC</i><br><i>ΔpatS::Ω</i><br>Sp <sup>f</sup> /Sm <sup>f</sup> ) | 24  | 16.27 ± 1.7  | 3.8 ± 0.24  | 70.44 ± 0.84;<br>27.78 ± 0.69;<br>1.78 ± 0.51 | YES |
|                                                                                   | 48  | 17.8 ± 1.31  | 6 ± 0.33    | 72.33 ± 1.76;<br>23.89 ± 1.68;<br>3.78 ± 1.02 |     |
|                                                                                   | 72  | 15.2 ± 1.78  | 11 ± 0.51   | 73.89 ± 1.68;<br>22.44 ± 0.84;<br>3.56 ± 1.26 |     |
|                                                                                   | 96  | 14.87 ± 1.22 | 12 ± 0.54   | 73.11 ± 3.17;<br>22.78 ± 2.67;<br>4.11 ± 0.51 |     |
|                                                                                   | 120 | 13.67 ± 1.33 | 11.9 ± 0.56 | 77 ± 1;<br>19 ± 1.53;<br>4.33 ± 0.88          |     |
| UHM225<br>( <i>ΔhetC</i><br><i>ΔhetN::Ω</i><br>Sp <sup>f</sup> /Sm <sup>f</sup> ) | 24  | 0.33 ± 0.31  | -           | 96.89 ± 0.84;<br>3.11 ± 0.84                  | YES |
|                                                                                   | 48  | 6.93 ± 0.99  | 10.6 ± 0.43 | 72.11 ± 1.26;<br>24.33 ± 1.33;<br>3.56 ± 0.51 |     |
|                                                                                   | 72  | 9.6 ± 0.87   | 10.8 ± 0.51 | 57.78 ± 3.24;<br>29.89 ± 2.04;<br>12.33 ± 1.2 |     |
|                                                                                   | 96  | 10.33 ± 1.21 | 10.2 ± 0.53 | 51.78 ± 0.69;<br>29.67 ± 1.2;<br>18.33 ± 1.86 |     |
|                                                                                   | 120 | 8.27 ± 0.88  | 11.6 ± 0.53 | 55.11 ± 1.17;<br>24.56 ± 1.35;<br>20.33 ± 1.2 |     |

At the indicated times following nitrogen stepdown, 500 cells were counted in triplicate and total heterocysts are presented as the mean ± the standard deviation. The presence of single (top line), double (second line), or multiple contiguous heterocysts (third line) was determined for 300 heterocyst occurrences in triplicate and are presented as the average percent ± the standard deviation. The number of vegetative cell between heterocysts was counted for 300 intervals and is presented as the mean ± the standard deviation of the mean. The ability to grow diazotrophically was assessed visually following two weeks of growth on solid BG-11 medium lacking a combined nitrogen source.

**Table S2.** Statistical analysis of differences in signal ranges 9 h following the removal of combined nitrogen. Pairwise comparisons of signal ranges recorded from the indicated strains were analyzed with a t-test. P-values are indicated for each pairwise comparison. Values below 0.05 were considered indicative of a significant difference between signal ranges.

|                          | WT | $\Delta patS$ | $\Delta hetN$ | $\Delta hetC$ | $\Delta hetC\Delta patS$ | $\Delta hetC\Delta hetN$ |
|--------------------------|----|---------------|---------------|---------------|--------------------------|--------------------------|
| WT                       |    | < 0.0001      | 0.16          | 0.59          | < 0.0001                 | 0.2                      |
| $\Delta patS$            |    |               | < 0.0001      | < 0.0001      | 1                        | 0.0006                   |
| $\Delta hetN$            |    |               |               | 0.55          | < 0.0001                 | 0.65                     |
| $\Delta hetC$            |    |               |               |               | < 0.0001                 | 0.26                     |
| $\Delta hetC\Delta patS$ |    |               |               |               |                          | 0.0046                   |
| $\Delta hetC\Delta hetN$ |    |               |               |               |                          |                          |

**Table S3.** Statistical analysis of differences in signal ranges 24 or 48 h following the removal of combined nitrogen. Pairwise comparisons of signal ranges recorded from the indicated strains were analyzed with a t-test. P-values are indicated for each pairwise comparison. Values below 0.05 were considered indicative of a significant difference between signal ranges.

|                          | WT | $\Delta patS$ | $\Delta hetN$ | $\Delta hetC$ | $\Delta hetC\Delta patS$ | $\Delta hetC\Delta hetN$ |
|--------------------------|----|---------------|---------------|---------------|--------------------------|--------------------------|
| WT                       |    | N/A           | 0.92          | < 0.0001      | < 0.0001                 | < 0.0001                 |
| $\Delta patS$            |    |               | N/A           | N/A           | N/A                      | N/A                      |
| $\Delta hetN$            |    |               |               | < 0.0001      | < 0.0001                 | < 0.0001                 |
| $\Delta hetC$            |    |               |               |               | 0.46                     | 1                        |
| $\Delta hetC\Delta patS$ |    |               |               |               |                          | 0.57                     |
| $\Delta hetC\Delta hetN$ |    |               |               |               |                          |                          |

**Table S4.** Strains, plasmids, and oligonucleotide primers used in this study.

| Strain or plasmid                  | Characteristic(s)*                                                                                         | Source or reference        |
|------------------------------------|------------------------------------------------------------------------------------------------------------|----------------------------|
| <b>Anabaena sp. strains</b>        |                                                                                                            |                            |
| PCC 7120                           | Wild type                                                                                                  | Pasteur Culture Collection |
| UHM103                             | $\Delta hetR$                                                                                              | (1)                        |
| UHM115                             | $\Delta hetN::\Omega Sp^r/Sm^r$                                                                            | (1)                        |
| UHM224                             | $\Delta hetC \Delta patS::\Omega Sp^r/Sm^r$                                                                | This study                 |
| UHM225                             | $\Delta hetC \Delta hetN::\Omega Sp^r/Sm^r$                                                                | This study                 |
| UHM232                             | $\Delta hetC$                                                                                              | This study                 |
| UHM334                             | $\Delta patS::\Omega Sp^r/Sm^r$                                                                            | This study                 |
| <b>Plasmids</b>                    |                                                                                                            |                            |
| pBlueScript SK+                    | Cloning vector, Ap <sup>r</sup>                                                                            | Stratagene                 |
| pAM504                             | Shuttle vector for replication in <i>E. coli</i> and <i>Anabaena</i> ; Km <sup>r</sup> Nm <sup>r</sup>     | (2)                        |
| pUC57-PS12-cfp                     | Plasmid used as template for CFP                                                                           | (3)                        |
| pUC57-PS12-yfp                     | Plasmid used as template for YFP                                                                           | (3)                        |
| pRL277                             | Suicide vector; Sp <sup>r</sup> /Sm <sup>r</sup>                                                           | (4)                        |
| pAM1951                            | pAM504 with P <sub>patS</sub> -gfp                                                                         | (5)                        |
| pSMC126                            | pAM504 with P <sub>hetN</sub> -gfp                                                                         | (6)                        |
| pSMC164                            | Suicide plasmid used to replace <i>patS</i> with Sp <sup>r</sup> /Sm <sup>r</sup> $\Omega$ interposon      | (7)                        |
| pSMC182                            | Suicide plasmid used to replace <i>hetN</i> with Sp <sup>r</sup> /Sm <sup>r</sup> $\Omega$ interposon      | (1)                        |
| pDR306                             | pAM504 with P <sub>petE</sub> - <i>hetR</i> (H69Y)-gfp                                                     | (8)                        |
| pPJAV123                           | pAM504 with the NdeI site removed                                                                          | (9)                        |
| pPJAV341                           | pAM504 with P <sub>hetN</sub> -EcFbFP                                                                      | (9)                        |
| pPJAV243                           | pAM504 with P <sub>petE</sub> -CFP                                                                         | This study                 |
| pPJAV247                           | pAM504 with P <sub>petE</sub> - <i>hetR</i> (H69Y)-CFP transcribed divergently from P <sub>patS</sub> -YFP | This study                 |
| pKH206                             | pRL277 used to delete <i>hetC</i>                                                                          | This study                 |
| <b>Oligonucleotide<sup>a</sup></b> |                                                                                                            |                            |
| <b>Sequence</b>                    |                                                                                                            |                            |
| CCFP2-PpetE-OEX-F                  | GATCCTCCCGCGGATCGGCGTCAGCTATGAGCGGGGGCGAGGAGCTGTTTCGCTGGC                                                  |                            |
| CCFP2-PpetE-OEX-R                  | CGATCCGCGGGAGGATCCCCGGGCATATGGTTCTCCTAACCTGTAGTTTTATTTTTTC                                                 |                            |
| CCFP2-SacI-R                       | ATATAGAGCTCTTAGCGGTACAGCTCGTCCATGCCGTG                                                                     |                            |
| del-hetC-dn-F                      | AAACAGACCCGGGTCTAGTCAGTTGTCAG                                                                              |                            |
| del-hetC-dn-R                      | TATATGAGCTCTACTAGGTAATGAGG                                                                                 |                            |
| del-hetC-up-F                      | TATATAGATCTCAACCAAGGGAAAATG                                                                                |                            |
| del-hetC-up-R                      | TGACTAGACCCGGGTCTGTTTGGTGTGTAAAC                                                                           |                            |
| del-hetC-dn-out                    | TTTTTCATGAATGTCACCCG                                                                                       |                            |
| del-hetC-up-out                    | AACCAGTGTTAACAATTTTCGG                                                                                     |                            |
| HetR-F-NdeI-express                | ATCGATCGCATATGAGTAACGACATCGATCTGATC                                                                        |                            |
| hetR-tln-BamHI-R                   | GGATCCATCTTCTTTTCTACCAAACACCATTTG                                                                          |                            |
| down-hetN-R                        | GGATCCGCCCATTAATATAAGTCTC                                                                                  |                            |
| up-hetN-F                          | GAGCTCGGCAAGCAGAGTTAATC                                                                                    |                            |
| patSfor                            | GATATCTAATCGATGCCACATCTAAG                                                                                 |                            |
| patSrev                            | CACATTAATCTCACTAACTTCTACATC                                                                                |                            |
| PpatS-MunI-F                       | ATATACAATTGTGAATTTGTTTTGGGAACACTTAAG                                                                       |                            |
| PpatS-OEX-R                        | CGCCGCTGCTCATGTATATCTCCTTCTTAAATCTAGCGCTCATC                                                               |                            |
| PpetE-XhoI-F                       | TATATCTCGAGGCTGAGGTAAGTACTGAGTACACAGC                                                                      |                            |

|             |                                           |
|-------------|-------------------------------------------|
| Turbo-OEX-F | GAAGGAGATATACATGAGCAGCGGCCCTGCTGTTCCACGGC |
| YFP-MunI-R  | ATATACAATTGTCAGCTGGTGTCTCCGGAAC           |

\*Ap, ampicillin; Km, kanamycin; Nm, neomycin; Sp, spectinomycin; Sm, streptomycin.

<sup>a</sup>Oligonucleotides are shown in the 5'-to-3' direction.

## References cited

1. **Borthakur, P. B., C. C. Orozco, S. S. Young-Robbins, R. Haselkorn, and S. M. Callahan.** 2005. Inactivation of *patS* and *hetN* causes lethal levels of heterocyst differentiation in the filamentous cyanobacterium *Anabaena* sp. PCC 7120. *Mol. Microbiol.* **57**:111-123.
2. **Wei, T.-F., R. Ramasubramanian, and J. W. Golden.** 1994. *Anabaena* sp. strain PCC 7120 *ntcA* gene required for growth on nitrate and heterocyst development. *J. Bacteriol.* **176**:4473-4482.
3. **Norris, M. H., Y. Kang, B. Wilcox, and T. T. Hoang.** 2010. Stable site-specific fluorescent tagging constructs optimized for Burkholderia species. *Appl. Env. Microbiol.* **76**:7635-7640.
4. **Black, T. A., Y. Cai, and C. P. Wolk.** 1993. Spatial expression and autoregulation of *hetR*, a gene involved in the control of heterocyst development in *Anabaena*. *Mol. Microbiol.* **9**:77-84.
5. **Yoon, H.-S., and J. W. Golden.** 1998. Heterocyst pattern formation controlled by a diffusible peptide. *Science* **282**:935-938.
6. **Callahan, S. M., and W. J. Buikema.** 2001. The role of HetN in maintenance of the heterocyst pattern in *Anabaena* sp. PCC 7120. *Mol. Microbiol.* **40**:941-950.
7. **Orozco, C. C., D. D. Risser, and S. M. Callahan.** 2006. Epistasis analysis of four genes from *Anabaena* sp. strain PCC 7120 suggests a connection between PatA and PatS in heterocyst pattern formation. *J. Bacteriol.* **188**:1808-1816.
8. **Risser, D. D., and S. M. Callahan.** 2009. Genetic and cytological evidence that heterocyst patterning is regulated by inhibitor gradients that promote activator decay. *Proc. Natl. Acad. Sci. USA* **106**:19884-19888.
9. **Videau, P., R. T. Oshiro, L. M. Cozy, and S. M. Callahan.** 2014. Transcriptional dynamics of developmental genes assessed with an FMN-dependent fluorophore in mature heterocysts of *Anabaena* sp. strain PCC 7120. *Microbiol.* **160**:1874-1881.
